# Supplementary material for: Hydroxide-based magneto-ionics: electric-field control of a reversible paramagnetic-to-ferromagnetic switch in α-Co(OH)2 films
Source: Royal Society of Chemistry journal article supplement (doi:10.1039/d2tc03422k), 2022-01-01
Supplement: d2tc03422k1.pdf [file d2tc03422k1.pdf]

## Supplementary Information

### **Hydroxide-based magneto-ionics: electric-field control of reversible paramagnetic-to-ferromagnetic switch in $\alpha$ -Co(OH)<sub>2</sub> films**

Alberto Quintana<sup>1\*</sup>, Abigail A. Firme<sup>2</sup>, Christopher J. Jensen<sup>1</sup>, Dongxing Zheng,<sup>3</sup> Chen Liu,<sup>3</sup>

Xixiang Zhang,<sup>3</sup> and Kai Liu<sup>1\*</sup>

<sup>1</sup>*Physics Department, Georgetown University, Washington, DC 20057, USA*

<sup>2</sup>*Department of Physics & Astronomy, University of Wyoming, Laramie, WY 82072, USA*

<sup>3</sup>*King Abdullah University of Science & Technology, Thuwal 23955-6900, Saudi Arabia*

\*Corresponding Authors: Alberto Quintana (aq76@georgetown.edu), Kai Liu (kai.liu@georgetown.edu)

## Supplementary Information

### 1. Sample Synthesis

The electrodeposition of cobalt hydroxide from cobalt nitrate bath is originated due to a local pH increase around the working electrode when nitrate ions are reduced, according to the following two possible chemical reactions:

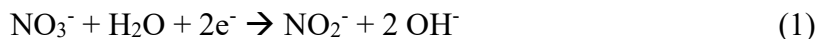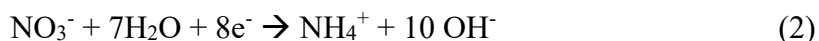

This reduction occurs at lower overpotentials than the metal Co deposition, producing an increase of OH<sup>-</sup> groups in the vicinity of the working electrode, hindering the cobalt metal deposition and promoting the formation of cobalt hydroxide. In some cases, especially when acidic electrolytes are employed, metallic cobalt co-deposition within the hydroxide can occur. It has been reported that the ratio of cation/nitrate anion plays an important role. Thus, to assure the cobalt deposition suppression, ammonia nitrate (NH<sub>4</sub>NO<sub>3</sub>) is introduced. This is crucial to achieve fully paramagnetic samples.<sup>1</sup>

As a first attempt, α-Co(OH)<sub>2</sub> films were electrodeposited using electrolytes with a Co(NO<sub>3</sub>)<sub>2</sub>·6H<sub>2</sub>O concentration of 0.1M.<sup>2</sup> Their morphology consist of hexagonal platelets randomly oriented with the basal planes perpendicular to the substrate surface (**Fig. S1a**).<sup>3-4</sup> This morphology leads to films with a large surface-to-volume ratio (i.e. porosity). Even though certain porosity could be beneficial, such as enhancing the magnetoelectric effects,<sup>5-7</sup> these films present uneven surfaces due to size dispersion of platelets. For this reason, their roughness needs to be minimized for thin-film based device applications.

## Supplementary Information

When  $\text{Co}(\text{NO}_3)_2 \cdot 6\text{H}_2\text{O}$  concentration in the electrolyte was increased to 1 M, the sample morphology improved with a more uniform surface (**Fig. S1b**). Close examination of the films still revealed a certain degree of porosity from the perpendicular growth of the platelets, but the films were more densely packed (**Fig. S1b inset**). However, cracks appeared all over the surface, produced by stress relaxation during sample growth.<sup>8</sup> When SDS was incorporated to the electrolyte, the film morphology was preserved and, importantly, crack formation was suppressed (**Fig. 1a** in main text). It has been reported that SDS acts as a stress-relieve agent during electrodeposition, avoiding crack formation.<sup>8-9</sup>

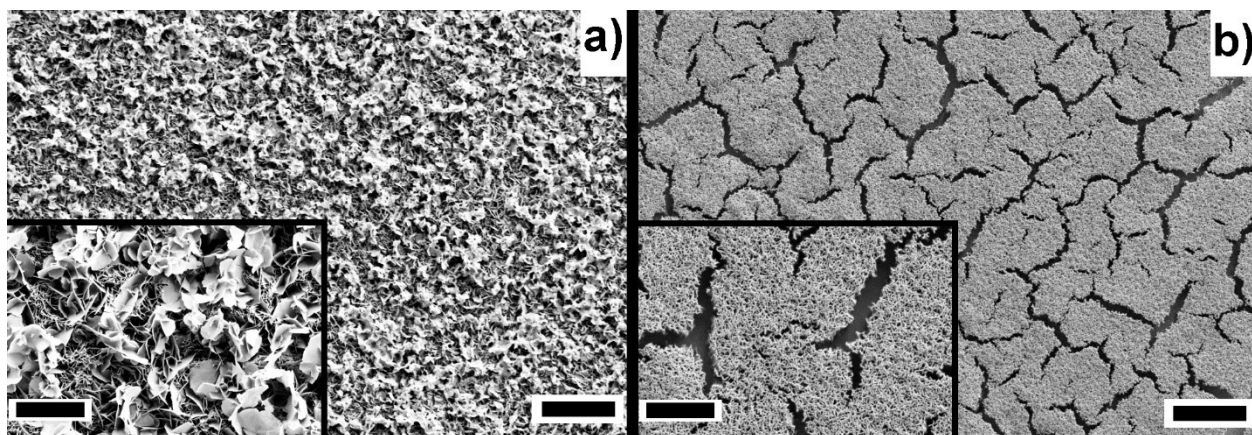

**Fig. S1:** Low and high resolution (inset) SEM images of the samples synthesized from an electrolyte containing a) 0.1 M and b) 1 M  $\text{Co}(\text{NO}_3)_2 \cdot 6\text{H}_2\text{O}$ . Scale bar is 10  $\mu\text{m}$  in images (a-b), and 4  $\mu\text{m}$  in (a-b) insets.

## Supplementary Information

### 2. Magnetic Switching

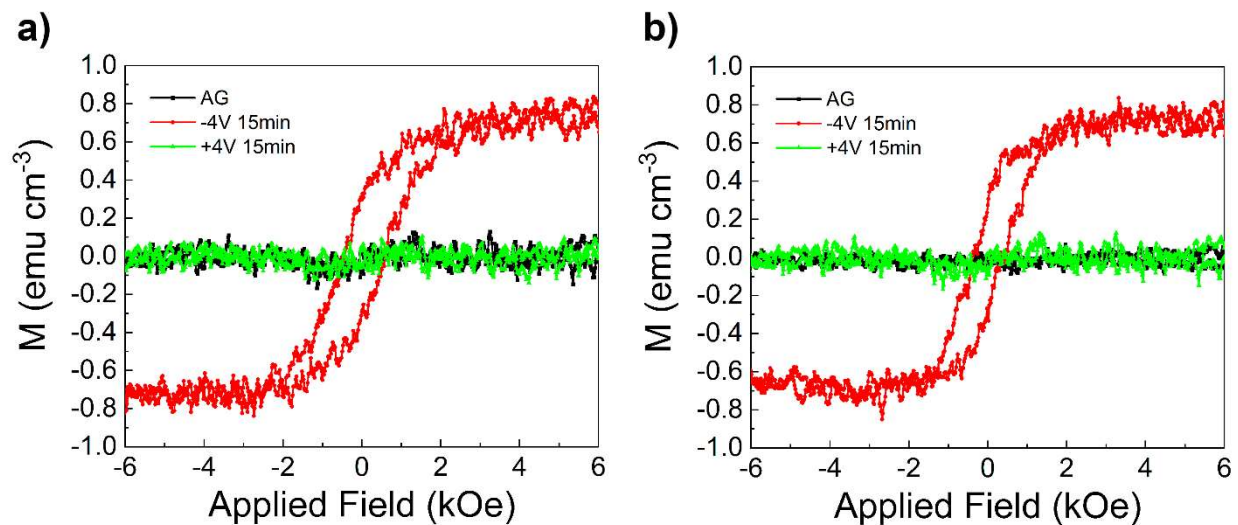

**Fig. S2:** Magnetic hysteresis loops for two consecutive switching cycles in  $\alpha\text{-Co(OH)}_2$  films after gating it at -4V and +4V for 15min each for a) one cycle and b) two cycles, respectively. Note that the AG in panel b) corresponds to the +4V 15 min state from panel a).

## Supplementary Information

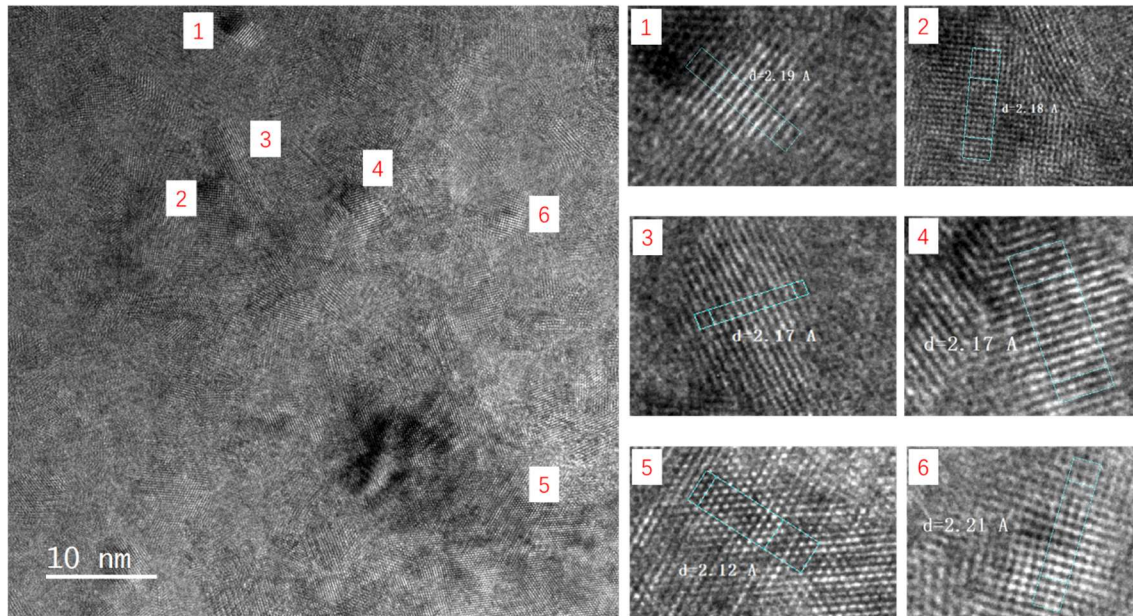

**Fig. S3:** High resolution scanning transmission electron microscopy and zoom-in images of labeled regions collected from an  $\alpha$ -Co(OH)<sub>2</sub> sample after a gating procedure of -8V for 3.5h. The  $d$ -spacing corresponds to (100) hcp Co.

## Supplementary Information

### References

1. Fedorov, F. S.; Podgainov, D.; Varezhnikov, A.; Lashkov, A.; Gorshenkov, M.; Burmistrov, I.; Sommer, M.; Sysoev, V., The Potentiodynamic Bottom-up Growth of the Tin Oxide Nanostructured Layer for Gas-Analytical Multisensor Array Chips. *Sensors* **2017**, *17* (8), 1908.
2. Gupta, V.; Kusahara, T.; Toyama, H.; Gupta, S.; Miura, N., Potentiostatically deposited nanostructured  $\alpha$ -Co(OH)<sub>2</sub>: A high performance electrode material for redox-capacitors. *Electrochem. Commun.* **2007**, *9* (9), 2315-2319.
3. Maile, N. C.; Patil, R. T.; Shinde, S. K.; Kim, D. Y.; Fulari, A. V.; Lee, D. S.; Fulari, V. J., Facial growth of Co(OH)<sub>2</sub> nanoflakes on stainless steel for supercapacitors: effect of deposition potential. *J. Mater. Sci.: Mater. Electron.* **2019**, *30* (6), 5555-5566.
4. Fedorov, F. S.; Linnemann, J.; Tschulik, K.; Giebel, L.; Uhlemann, M.; Gebert, A., Capacitance performance of cobalt hydroxide-based capacitors with utilization of near-neutral electrolytes. *Electrochim. Acta* **2013**, *90*, 166-170.
5. Quintana, A.; Zhang, J.; Isarain-Chávez, E.; Menéndez, E.; Cuadrado, R.; Robles, R.; Baró, M. D.; Guerrero, M.; Pané, S.; Nelson, B. J.; Müller, C. M.; Ordejón, P.; Nogués, J.; Pellicer, E.; Sort, J., Voltage-Induced Coercivity Reduction in Nanoporous Alloy Films: A Boost toward Energy-Efficient Magnetic Actuation. *Adv. Funct. Mater.* **2017**, *27* (32), 1701904.
6. Robbenolt, S.; Menéndez, E.; Quintana, A.; Gómez, A.; Auffret, S.; Baltz, V.; Pellicer, E.; Sort, J., Reversible, Electric-Field Induced Magneto-Ionic Control of Magnetism in Mesoporous Cobalt Ferrite Thin Films. *Sci. Rep.* **2019**, *9* (1), 10804.
7. Robbenolt, S.; Nicolenco, A.; Mercier Fernandez, P.; Auffret, S.; Baltz, V.; Pellicer, E.; Menéndez, E.; Sort, J., Electric Field Control of Magnetism in Iron Oxide Nanoporous Thin Films. *ACS Appl. Mater. Interfaces* **2019**, *11* (40), 37338-37346.
8. Quintana, A.; Varea, A.; Guerrero, M.; Suriñach, S.; Baró, M. D.; Sort, J.; Pellicer, E., Structurally and mechanically tunable molybdenum oxide films and patterned submicrometer structures by electrodeposition. *Electrochim. Acta* **2015**, *173*, 705-714.
9. Elansezhian, R.; Ramamoorthy, B.; Nair, P. K., The influence of SDS and CTAB surfactants on the surface morphology and surface topography of electroless Ni-P deposits. *J. Mater. Process. Technol.* **2009**, *209* (1), 233-240.
